# Supplementary material for: Leaving the day behind: endovascular therapy beyond 24 h in acute stroke of the anterior and posterior circulation
Source: PubMed Central journal article supplement — Ther Adv Neurol Disord. 2022 May 25;15:17562864221101083. doi: 10.1177/17562864221101083 (PMC9136439; doi:10.1177/17562864221101083), 2022-05-25
Supplement: sj-pdf-1-tan-10.1177_17562864221101083.pdf [file sj-pdf-1-tan-10.1177_17562864221101083.pdf]

**ONLINE SUPPLEMENTAL  
for manuscript entitled**

**Leaving the day behind: Endovascular therapy beyond 24 h in acute stroke of the anterior  
and posterior circulation**

**By**

**Jan C. Purrucker, Peter A. Ringleb, Fatih Seker, Arne Potreck, Simon Nagel, Silvia  
Schönenberger, Anne Berberich, Ulf Neuberger, Markus Möhlenbruch\*, Charlotte  
Weyland\***

**Supplementary Tables**

- S1 Demographic and clinical characteristics and functional outcome in the subgroups of patients treated more than 24 h after last-seen-well or after definite symptom recognition
- S2 Radiological characteristics and functional outcome in the subgroups of patients treated more than 24 h after last-seen-well or after definite symptom recognition
- S3 Characteristics of patients in the EVT more than 24 h group with favorable versus unfavorable outcome
- S4 Characteristics of patients with anterior versus posterior circulation stroke

**Supplementary Figure**

- SF1 Distribution of modified Rankin scale scores pre stroke and after 3 months

**Table S1 Demographic and clinical characteristics and functional outcome in the subgroups of patients treated more than 24 h after last-seen-well or after definite symptom recognition**

|                                             | <b>EVT<sub>&gt;24LSW</sub> (N = 16)</b> | <b>EVT<sub>&gt;24DEF</sub> (N = 27)</b> | <b>p-value</b> |
|---------------------------------------------|-----------------------------------------|-----------------------------------------|----------------|
| Age, years, mean (SD)                       | 77.6 (10.8)                             | 74.2 (9.7)                              | 0.288          |
| Female sex, n (%)                           | 9 (56.3)                                | 14 (51.9)                               | >0.99          |
| Referral, n (%)                             | 7 (43.8)                                | 21 (77.8)                               | 0.045          |
| <i>Comorbidities, n (%)</i>                 |                                         |                                         |                |
| Prior stroke/TIA                            | 0/15 (0)                                | 5 (18.5)                                | 0.142          |
| Atrial fibrillation                         | 9 (56.3)                                | 4 (14.8)                                | 0.007          |
| Arterial hypertension                       | 14/15 (93.3)                            | 18 (66.7)                               | 0.068          |
| Diabetes mellitus                           | 4/15 (26.7)                             | 8 (29.6)                                | >0.99          |
| Hyperlipidemia                              | 3 (18.8)                                | 11 (40.7)                               | 0.186          |
| Ischemic heart disease                      | 5/15 (33.3)                             | 5 (18.5)                                | 0.451          |
| Peripheral artery disease                   | 0 (0)                                   | 2 (7.7)                                 | 0.517          |
| <i>Prior medication, n (%)</i>              |                                         |                                         |                |
| Antiplatelet                                | 7/15 (46.7)                             | 8/26 (30.8)                             | 0.336          |
| Oral anticoagulation                        | 2 (12.5)                                | 2 (7.7)                                 | 0.628          |
| NIHSS before EVT, median (IQR) <sup>a</sup> | 21 (11–22)                              | 11 (7–19)                               | 0.033          |
| <i>Functional status</i>                    |                                         |                                         |                |
| Prestroke mRS, median (IQR)                 | 1 (0–3)                                 | 0 (0–2)                                 | 0.249          |
| mRS at day 90, median (IQR)                 | 5 (4–6)                                 | 4 (2–5)                                 | 0.071          |
| Favorable outcome, n (%)                    | 2 (12.5)                                | 8 (29.6%)                               | 0.276          |
| Death, n (%)                                | 7 (43.8)                                | 5 (18.5)                                | 0.092          |

For abbreviations and definitions please refer to the main text. <sup>a</sup> Missing data in 1/43 (2.3%).

**Table S2 Radiological characteristics, and functional outcome in the subgroups of patients treated more than 24 h after last-seen-well or after definite symptom recognition**

|                                              | <b>EVT<sub>&gt;24LSW</sub> (N = 16)</b> | <b>EVT<sub>&gt;24DEF</sub> (N = 27)</b> | <b>p-value</b> |
|----------------------------------------------|-----------------------------------------|-----------------------------------------|----------------|
| ASPECTS, median (IQR) <sup>a</sup>           | 9 (8–10)                                | 8 (7–9)                                 | 0.201          |
| Collateral status, median (IQR) <sup>b</sup> | 2 (1–3)                                 | 3 (2–3)                                 | 0.254          |
| Occlusion site, n (%)                        |                                         |                                         | 0.404          |
| ICA                                          | 0 (0)                                   | 2 (7.4)                                 |                |
| ICA plus MCA                                 | 4 (25)                                  | 2 (7.4)                                 |                |
| ACA                                          | 0 (0)                                   | 0 (0)                                   |                |
| Carotid T                                    | 4 (25)                                  | 3 (11.1)                                |                |
| MCA, M1                                      | 4 (25)                                  | 6 (22.2)                                |                |
| MCA, M2                                      | 2 (12.5)                                | 3 (11.1)                                |                |
| MCA, M3                                      | 0 (0)                                   | 1 (3.7)                                 |                |
| PCA                                          | 0 (0)                                   | (0)                                     |                |
| BA                                           | 2 (12.5)                                | 9 (33.3)                                |                |
| VA                                           | 0 (0)                                   | 1 (3.7)                                 |                |
| Stenosis, detected, n (%)                    | 2 (12.5)                                | 14 (51.9)                               | <b>0.021</b>   |
| Reperfusion, n (%)                           |                                         |                                         |                |
| mTICI 2c–3                                   | 9 (56.3)                                | 16 (59.3)                               | >0.99          |
| mTICI 2b–3                                   | 11 (68.8)                               | 22 (81.5)                               | 0.46           |
| mTICI 0                                      | 4 (25)                                  | 5 (18.5)                                | 0.706          |

For abbreviations and definitions please refer to the main text. <sup>a</sup> Assessable in 27/43. <sup>b</sup> Collateral status according to Tan score, assessable in n=25/43 cases [anterior circulation only].

**S3 Characteristics of patients in the EVT more than 24 h group with favorable versus unfavorable outcome**

|                                              | <b>Favorable outcome<br/>(N = 10)</b> | <b>Unfavorable outcome<br/>(N = 33)</b> | <b>p-value</b> |
|----------------------------------------------|---------------------------------------|-----------------------------------------|----------------|
| Age, years, mean (SD)                        | 76 (12)                               | 75 (10)                                 | 0.77           |
| Female sex, n (%)                            | 7 (70)                                | 16 (49)                                 | 0.294          |
| Referral, n (%)                              | 9 (90)                                | 19 (58)                                 | 0.127          |
| <i>Comorbidities, n (%)</i>                  |                                       |                                         |                |
| Prior stroke/TIA                             | 0 (0)                                 | 5 (16)                                  | 0.315          |
| Atrial fibrillation                          | 4 (40)                                | 9 (27)                                  | 0.696          |
| Arterial hypertension                        | 8 (80)                                | 24 (75)                                 | >0.99          |
| Diabetes mellitus                            | 1 (10)                                | 11 (34)                                 | 0.233          |
| Hyperlipidemia                               | 5 (50)                                | 9 (27)                                  | 0.252          |
| Ischemic heart disease                       | 1 (10)                                | 9 (28)                                  | 0.404          |
| Peripheral artery disease                    | 0 (0)                                 | 2 (6)                                   | >0.99          |
| <i>Prior medication, n (%)</i>               |                                       |                                         |                |
| Antiplatelet                                 | 5 (50)                                | 10 (32)                                 | 0.453          |
| Oral anticoagulation                         | 0 (0)                                 | 4 (13)                                  | 0.557          |
| NIHSS before EVT, median (IQR) <sup>a</sup>  | 8 (5–24)                              | 15 (10–21)                              | 0.321          |
| Prestroke mRS*                               | 1 (0–1)                               | 0 (0–3)                                 | 0.675          |
| EVT > 24 since definite symptom onset        | 8 (80)                                | 19 (58)                                 | 0.276          |
| ASPECTS, median (IQR) <sup>a</sup>           | 10 (7–10)                             | 8 (8–10)                                | 0.615          |
| Collateral status, median (IQR) <sup>b</sup> | 3 (3–3)                               | 2 (1–3)                                 | 0.043          |
| Occlusion site, n (%)                        |                                       |                                         | 0.582          |
| ICA                                          | 0 (0)                                 | 2 (6)                                   |                |
| ICA plus MCA                                 | 1 (10)                                | 5 (15)                                  |                |
| ACA                                          | 0 (0)                                 | 0 (0)                                   |                |
| Carotid T                                    | 3 (30)                                | 4 (12)                                  |                |
| MCA, M1                                      | 4 (40)                                | 6 (18)                                  |                |
| MCA, M2                                      | 0 (0)                                 | 5 (15)                                  |                |
| MCA, M3                                      | 0 (0)                                 | 1 (3)                                   |                |
| PCA                                          | 0 (0)                                 | 0 (0)                                   |                |
| BA                                           | 2 (20)                                | 9 (27)                                  |                |
| VA                                           | 0 (0)                                 | 1 (3)                                   |                |
| Stenosis, detected, n (%)                    | 4 (40)                                | 12 (36)                                 | >0.99          |

|                    |          |         |       |
|--------------------|----------|---------|-------|
| Reperfusion, n (%) |          |         |       |
| mTICI 2c-3         | 8 (80)   | 17 (52) | 0.153 |
| mTICI 2b-3         | 10 (100) | 23 (70) | 0.084 |
| mTICI 0            | 0 (0)    | 9 (27)  | 0.089 |

<sup>a</sup> Assessable in 27/43; <sup>b</sup> Collateral status according to Tan score, assessable in n=25/43 cases

[anterior circulation only].

**Table S4 Characteristics of patients with anterior versus posterior circulation stroke**

|                                             | <b>EVT &gt;24</b> | <b>EVT &lt; 24</b> |                 | <b>EVT &gt;24</b> | <b>EVT &lt; 24</b> |                 |
|---------------------------------------------|-------------------|--------------------|-----------------|-------------------|--------------------|-----------------|
| Circulation                                 | Anterior          | Anterior           | <i>p</i> -value | Posterior         | Posterior          | <i>p</i> -value |
| N                                           | 31                | 2048               | -               | 12                | 256                | -               |
| Age, years, mean (SD)                       | 78.3 (8.3)        | 74 (12.7)          | 0.009           | 68.3 (11.2)       | 73.1 (12.4)        | 0.187           |
| Female sex, n (%)                           | 19 (61.3)         | 1081 (52.8)        | 0.371           | 4 (33.3)          | 112 (43.8)         | 0.562           |
| Referral, n (%)                             | 17 (54.8)         | 1084/1997 (54.3)   | >0.99           | 11 (91.7)         | 126 (49.8)         | 0.006           |
| <i>Comorbidities, n (%)</i>                 |                   |                    |                 |                   |                    |                 |
| Prior stroke/TIA                            | 3 (10)            | 438/2040 (21.5)    | 0.176           | 2 (16.7)          | 59/255 (23.1)      | >0.99           |
| Atrial fibrillation                         | 12 (38.7)         | 976/2040 (47.8)    | 0.367           | 1 (8.3)           | 99/254 (39)        | 0.034           |
| Arterial hypertension                       | 21 (70)           | 1560/2047 (76.2)   | 0.396           | 11 (91.7)         | 189/254 (74.4)     | 0.304           |
| Diabetes mellitus                           | 8 (26.7)          | 480/2046 (23.5)    | 0.667           | 4 (33.3)          | 60/255 (23.5)      | 0.49            |
| Hyperlipidemia                              | 9 (29)            | 739/2033 (36.4)    | 0.456           | 5 (41.7)          | 83/252 (32.9)      | 0.542           |
| Ischemic heart disease                      | 7 (23.3)          | 559/2044 (27.3)    | 0.836           | 3 (25)            | 67/252 (26.6)      | >0.99           |
| Peripheral artery disease                   | 1 (3.2)           | 145/2020 (7.2)     | 0.721           | 1/11 (9.1)        | 14/251 (5.6)       | >0.99           |
| <i>Prior medication, n (%)</i>              |                   |                    |                 |                   |                    |                 |
| Antiplatelet                                | 11/30 (36.7)      | 664/2015 (33)      | 0.697           | 4/11 (36.4)       | 74/247 (30)        | 0.739           |
| Oral anticoagulation                        | 4 (12.9)          | 401/2030 (19.8)    | 0.494           | 0/11 (0)          | 53/249 (21.3)      | 0.127           |
| NIHSS before EVT, median (IQR) <sup>a</sup> | 12 (8–21)         | 15 (10–20)         | 0.544           | 13 (10–20)        | 15 (7–34)          | 0.813           |
| <i>Functional status<sup>a</sup></i>        |                   |                    |                 |                   |                    |                 |
| Prestroke mRS, median (IQR)                 | 1 (0–3)           | 1 (0–2)            | 0.661           | 0 (0–1)           | 1 (0–2)            | 0.083           |
| mRS at day 90, median (IQR)                 | 4 (2–5)           | 3 (2–5)            | 0.144           | 5 (3–6)           | 4 (2–6)            | 0.245           |
| Favorable outcome, n (%)                    | 8 (25.8)          | 806/1999 (40.3)    | 0.138           | 2 (16.7)          | 80/251 (31.9)      | 0.352           |
| Death, n (%)                                | 7 (22.6)          | 492 (24.5)         | >0.99           | 5 (41.7)          | 92/252 (36.5)      | 0.764           |

|                                              |           |                  |       |           |                |       |
|----------------------------------------------|-----------|------------------|-------|-----------|----------------|-------|
| ASPECTS, median (IQR) <sup>a</sup>           | 9 (7–10)  | 9 (8–10)         | 0.559 | n.a.      | n.a.           | -     |
| Collateral status, median (IQR) <sup>a</sup> | 3 (1–3)   | n.a.             | -     | n.a.      | n.a.           | -     |
| Stenosis, detected, n (%)                    | 9 (29)    | n.a.             | -     | 7 (58.3)  | n.a.           |       |
| Reperfusion, n (%) <sup>a</sup>              |           |                  |       |           |                |       |
| mTICI 2c–3                                   | 17 (54.8) | 1166/2032 (57.4) | 0.855 | 8 (66.7)  | 170 (67.7)     | >0.99 |
| mTICI 2b–3                                   | 23 (74.2) | 1727/2032 (85)   | 0.124 | 10 (83.3) | 218/251 (86.9) | 0.665 |
| mTICI 0                                      | 7 (22.6)  | 200/2032 (9.8)   | 0.03  | 2 (16.7)  | 22 (8.8)       | 0.301 |

<sup>a</sup> Missing data in anterior circulation analysis: NIHSS 13/2048 (0.6%), pRS 13/2048 (0.6%), mRS at day 90 36/2048 (1.8%), mTICI 16/2048 (0.8%); ASPECTS assessable in 27/31 and 1855/2048; TAN scores 25/31. Missing data in posterior circulation analysis: NIHSS 11/12 (8.3%) and 2/256 (0.8%), pRS 1/256 (0.4%), mRS at day 90 4/256 (1.6%), mTICI 5/256 (2%).

**Figure SF1** Distribution of modified Rankin scale scores pre stroke and after 3 months

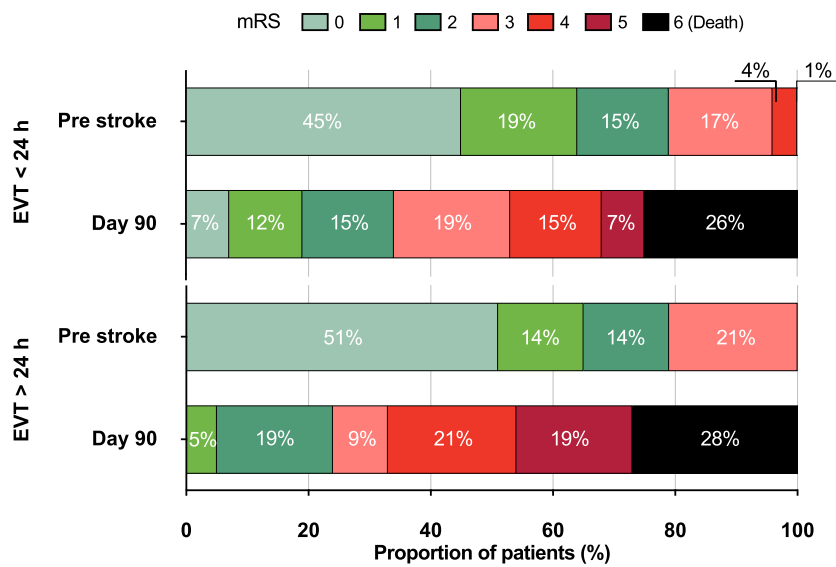

Distribution of modified Rankin scale scores pre stroke and after 3 months. Pre stroke mRS was missing in 14/2304 (0.6%) and mRS at day 90 missing in 40/2304 (1.7%) (EVT < 24 h).
